# Supplementary material for: Heat and osmosis cooperatively driven power generation in robust two-dimensional hybrid nanofluidic channels
Source: Royal Society of Chemistry journal article supplement (doi:10.1039/d3ta01306e), 2023-01-01
Supplement: d3ta01306e1.pdf [file d3ta01306e1.pdf]

## Electronic Supplementary Information

### Heat and osmosis cooperatively driven power generation in robust two-dimensional hybrid nanofluidic channels

*Tianliang Xiao, Xuejiang Li, Zhaoyue Liu\*, Bingxin Lu, Jin Zhai\* and Xungang Diao\**

#### Content:

1. The morphology characterizations of different 2D nanochannel membranes (Figure S1).
2. Schematic setup of the energy conversion device (Figure S2).
3. Osmosis and heat-osmosis cooperatively driven power generation performance of MMT nanochannel membrane (Figure S3).
4. Osmosis and heat-osmosis cooperatively driven power generation performance of MG-75% nanochannel membrane (Figure S4).
5. Osmosis and heat-osmosis cooperatively driven power generation performance of MG-50% nanochannel membrane (Figure S5).
6. Osmosis and heat-osmosis cooperatively driven power generation performance of MG-25% nanochannel membrane (Figure S6).
7. Osmosis and heat-osmosis cooperatively driven power generation performance of GO nanochannel membrane (Figure S7).
8. The power density and  $I_{SC}$  of MG-75% nanochannels in 50-fold electrolytes with different cations (LiCl, NaCl and KCl) (Figure S8).
9. The heat and osmosis cooperatively driven power generation performance of MG-75% nanochannel membrane with different temperature gradient (Figure S9).
10. The comparison of power density among proposed hybrid nanofluidic channels and state-of-the-art 2D nanochannels (Table S1).

11. Numerical simulations of heat and osmosis cooperatively driven power generation (Figure S10).
12. The simulated current, anion current and cation current of different surface charge density (Figure S11).
13. The simulated  $I-V$  curves of different temperature gradient (Figure S12).

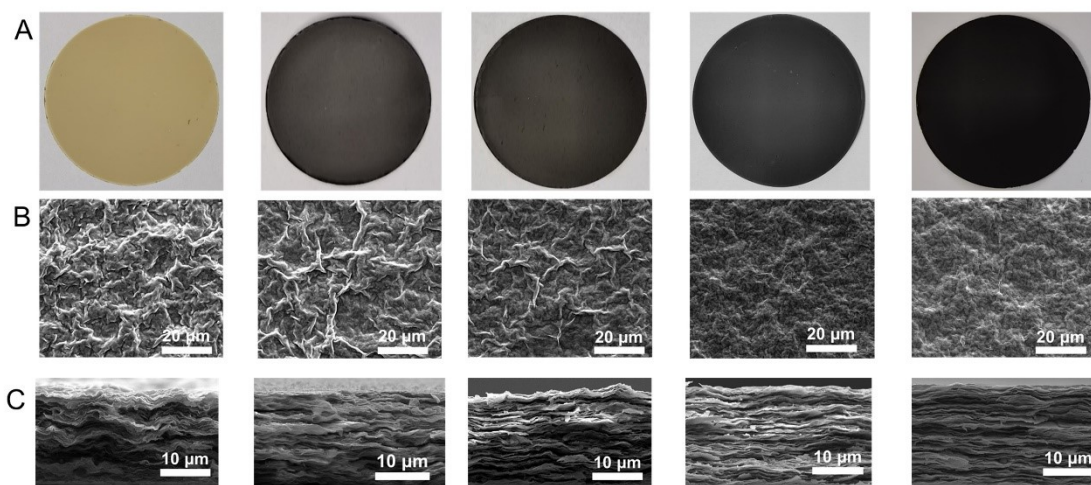

**Figure S1.** The optical photographs (A), the SEM images of surface (B) and cross section (C) of MMT, MG-75%, MG-50%, MG-25 and GO nanochannel membranes.

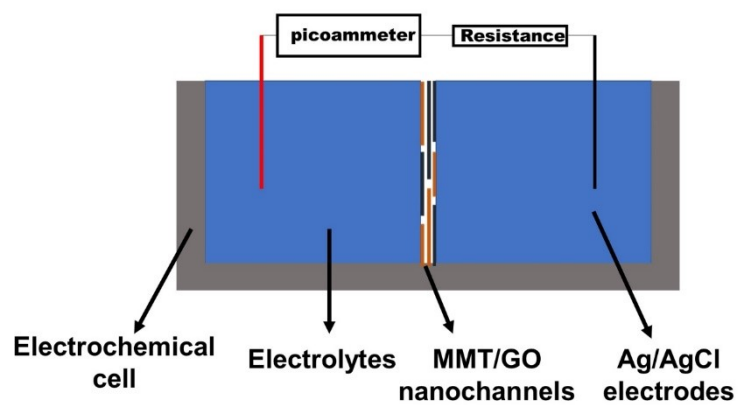

**Figure S2.** Schematic setup of the energy conversion device. The nanochannel membranes were placed in the middle of an electrochemical cell. The two chambers were filled with electrolytes of different concentration and temperature, which were connected with Ag/AgCl electrodes.

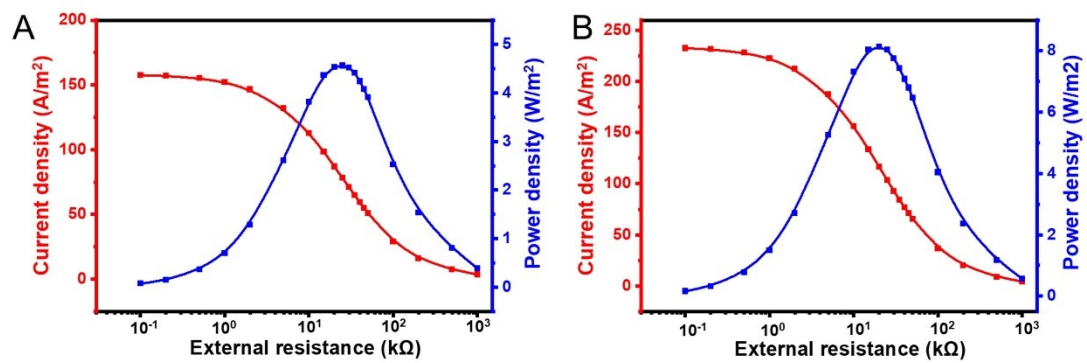

**Figure S3.** The current density and power density of MMT nanochannel membrane with 50-fold salinity gradient (A) and 50-fold salinity gradient coupled with 30 °C temperature gradient (B).

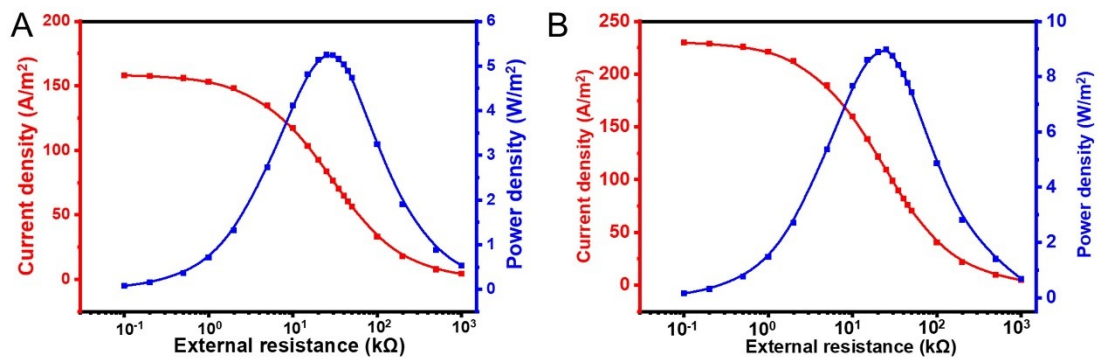

**Figure S4.** The current density and power density of MG-75% nanochannel membrane with 50-fold salinity gradient (A) and 50-fold salinity gradient coupled with 30 °C temperature gradient (B).

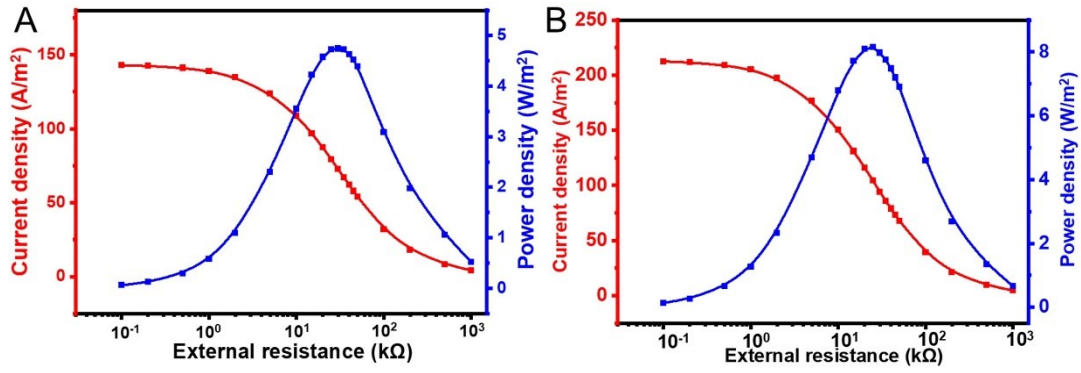

**Figure S5.** The current density and power density of MG-50% nanochannel membrane with 50-fold salinity gradient (A) and 50-fold salinity gradient coupled with 30 °C temperature gradient (B).

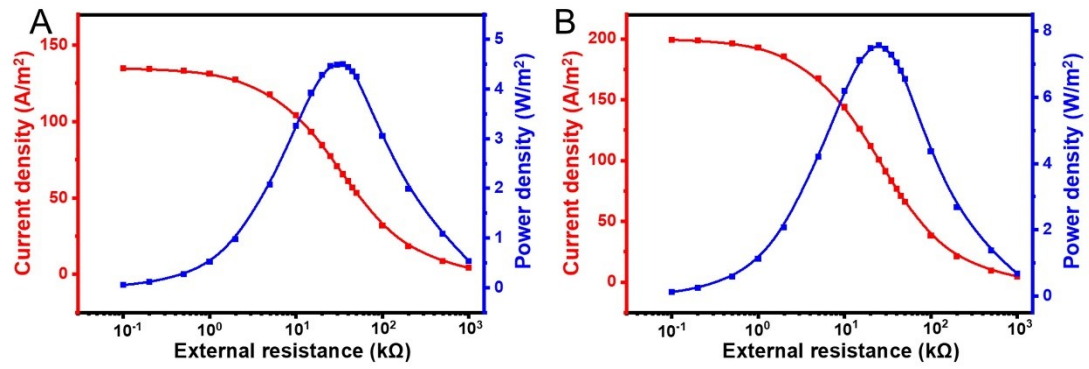

**Figure S6.** The current density and power density of MG-25% nanochannel membrane with 50-fold salinity gradient (A) and 50-fold salinity gradient coupled with 30 °C temperature gradient (B).



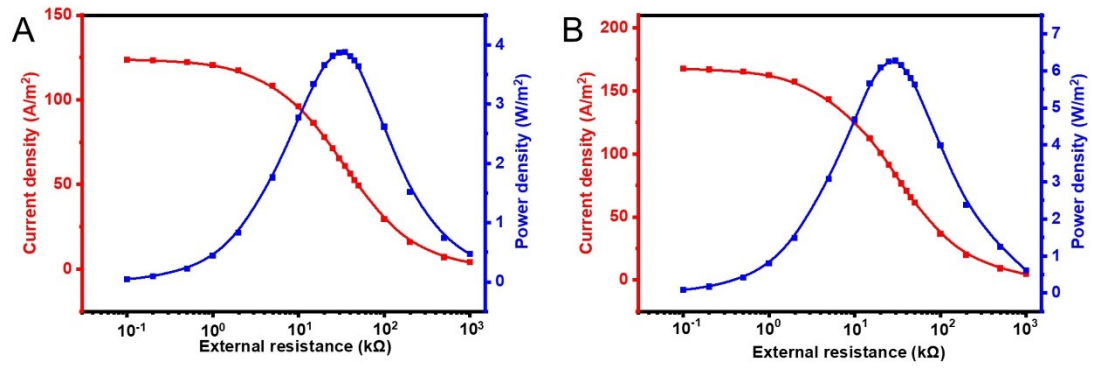

**Figure S7.** The current density and power density of GO nanochannel membrane with 50-fold salinity gradient (A) and 50-fold salinity gradient coupled with 30 °C temperature gradient (B).

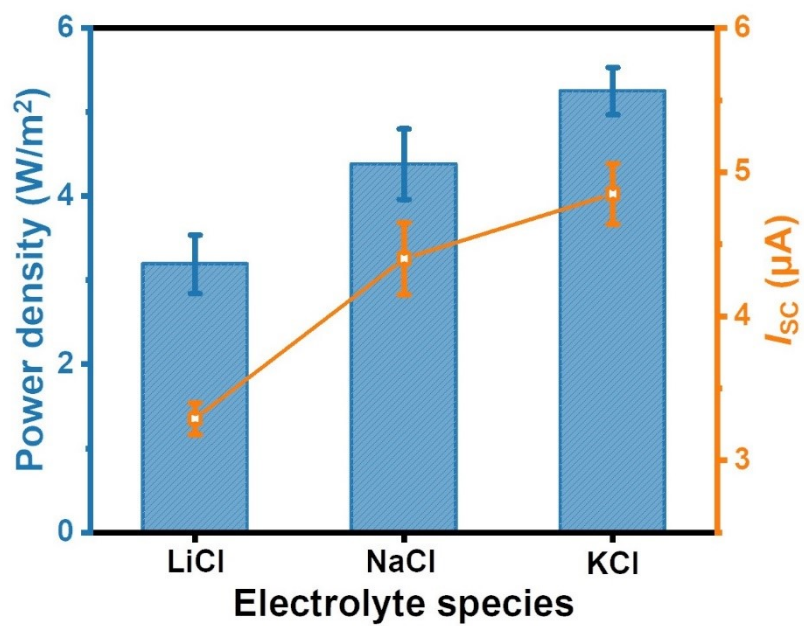

**Figure S8.** The power density and  $I_{SC}$  of MG-75% nanochannels in 50-fold electrolytes with different cations (LiCl, NaCl and KCl).

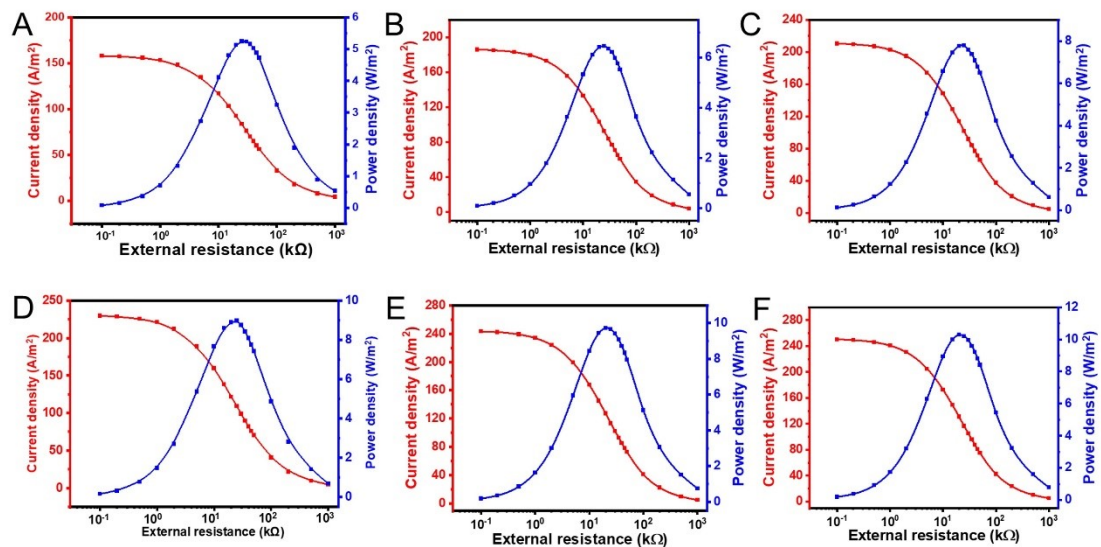

**Figure S9.** The current density and power density of MG-75% nanochannel membrane with 50-fold salinity gradient coupled with temperature gradient of 0 °C (A), 10 °C (B), 20 °C (C), 30 °C (D), 40 °C (E) and 50 °C (F).

**Table S1.** The comparison of power density among proposed hybrid nanofluidic channels and state-of-the-art 2D nanochannels.

| Nanochannels             | Salinity Gradient | Temperature | Power density (W/m <sup>2</sup> ) | Year | Ref. |
|--------------------------|-------------------|-------------|-----------------------------------|------|------|
| black phosphorus/GO      | 50                | 298 K       | 3.4                               | 2020 | S1   |
| GO/CNFs                  | 50                | 323 K       | 7.2                               | 2020 | S2   |
| GO/SNFs/GO               | 50                | 313 K       | 9.0                               | 2020 | S3   |
| oppositely charged MXene | 50                | 298 K       | 4.6                               | 2020 | S4   |
| MoS <sub>2</sub> /CNFs   | 50                | 298 K       | 5.2                               | 2021 | S5   |
| GO/ANFs                  | 50                | 298 K       | 5.06                              | 2021 | S6   |
| vermiculite              | 50                | 298 K       | 4.5                               | 2021 | S7   |
| GO/AAO                   | 50                | 298 K       | 3.73                              | 2021 | S8   |
| MXene/BN                 | 50                | 336 K       | 6.2                               | 2021 | S9   |
| MXene/PS-b-P2VP          | 50                | 298 K       | 6.74                              | 2021 | S10  |
| heterogeneous MXene      | 50                | 298 K       | 8.6                               | 2022 | S11  |
| bsGOMs                   | 50                | 298 K       | 5.5                               | 2022 | S12  |
| CNC/GO                   | 50                | 337 K       | 10.92                             | 2022 | S13  |
| MXene/GO                 | 50                | 343 K       | 7.88                              | 2022 | S14  |
| heterogeneous MMT        | 50                | 298 K       | 2.1                               | 2022 | S15  |
| MMT/ANFs                 | 50                | 323 K       | 6.45                              | 2022 | S16  |
| MMT                      | 50                | 293 K/323 K | 8.53                              | 2022 | S17  |
| GO/PDA                   | 50                | 298 K       | 3.3                               | 2023 | S18  |
| This work (MMT/GO)       | 50                | 293 K/343 K | 10.29                             |      |      |

## Numerical simulations

The ion transport properties were quantitatively investigated using “Electrostatics”, “Transport of Diluted Species”, “Single-Phase Laminar Flow” and “Heat Transfer in Fluids” modules in COMSOL Multiphysics 5.6. To simplify the calculation, the 2D nanochannel membrane was theoretically modeled as a 600-nm-length ( $L$ ) cylindrical nanochannel with 4-nm width ( $d$ ) (Figure S9).  $c_H$  and  $c_L$  refer to the electrolyte concentration of high side and low side, respectively.  $T_H$  and  $T_L$  refer to the temperature of high and low electrolyte concentration side, respectively ( $\Delta T = T_L - T_H$ ). The calculation was based on the Poisson-Nernst-Planck equations, the steady state continuous equations and Einstein-Stokes equations as shown below:

$$\nabla^2 \phi = -\frac{F}{\varepsilon} \sum z_i c_i$$

$$J_i = -D_i \left( \nabla c_i + \frac{z_i F c_i}{RT} \nabla \phi \right)$$

$$\nabla J_i = 0$$

$$D_i = \frac{k_B T}{6\pi\eta r}$$

$\phi$ ,  $\varepsilon$ ,  $z_i$ ,  $c_i$ ,  $J_i$  and  $D_i$  denote electrical potential, the dielectric constant of medium, the charge number, the ionic concentration, the ionic flux and the diffusion coefficient of each species  $i$ , respectively.  $T$ ,  $F$ ,  $R$ ,  $k_B$ ,  $\eta$  and  $r$  are the absolute temperature, Faraday constant, universal gas constant, Boltzmann constant, the dynamic fluid viscosity of water and the ion size, respectively. The boundary conditions of the nanochannel are as follows:

$$\vec{n} \cdot \nabla \phi = -\frac{\sigma}{\varepsilon}$$

$$\vec{n} \cdot J_i = 0$$

$\vec{n}$  represents the unit normal vector.

The ionic current of species  $i$  can be calculated by integrating the ionic flux along the cross section of the nanochannel:

$$I_i = \int_s J_i ds = - \int_s D_i (\nabla c_i + \frac{z_i F c_i}{RT} \nabla \phi) ds$$

The cation transference number ( $t_+$ ) can be obtained by:

$$t_+ = \frac{|I_p|}{|I_p| + |I_n|}$$

$I_p$  and  $I_n$  refer to the cation current and anion current, respectively.

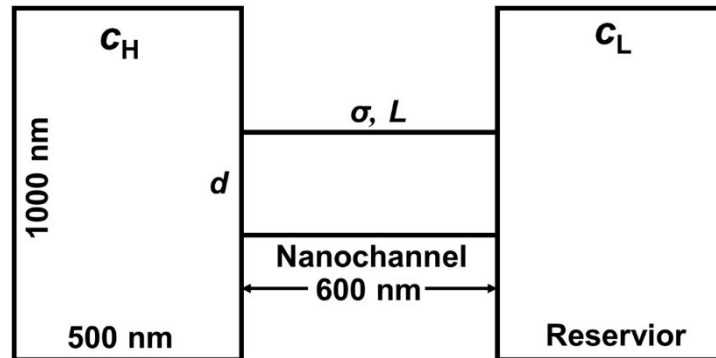

Figure S10. Theoretical model of the 2D nanochannels.

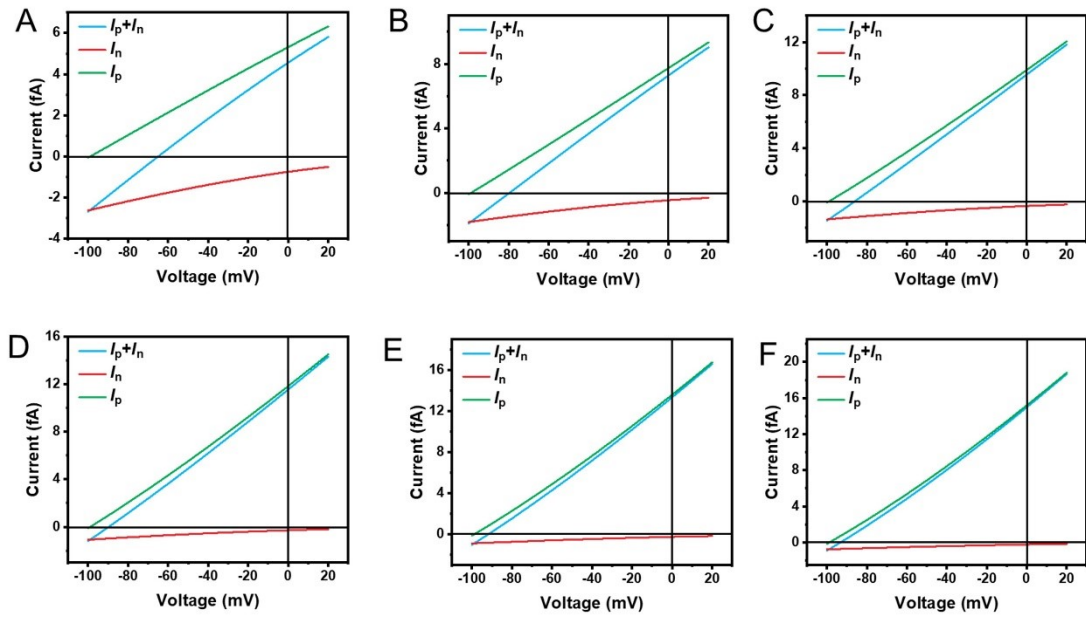

**Figure S11.** The simulated current, anion current and cation current by adjusting the surface charge density of the nanochannel from -1 to -6 mC/m<sup>2</sup> under 50-fold salinity gradient and 30 °C temperature gradient.

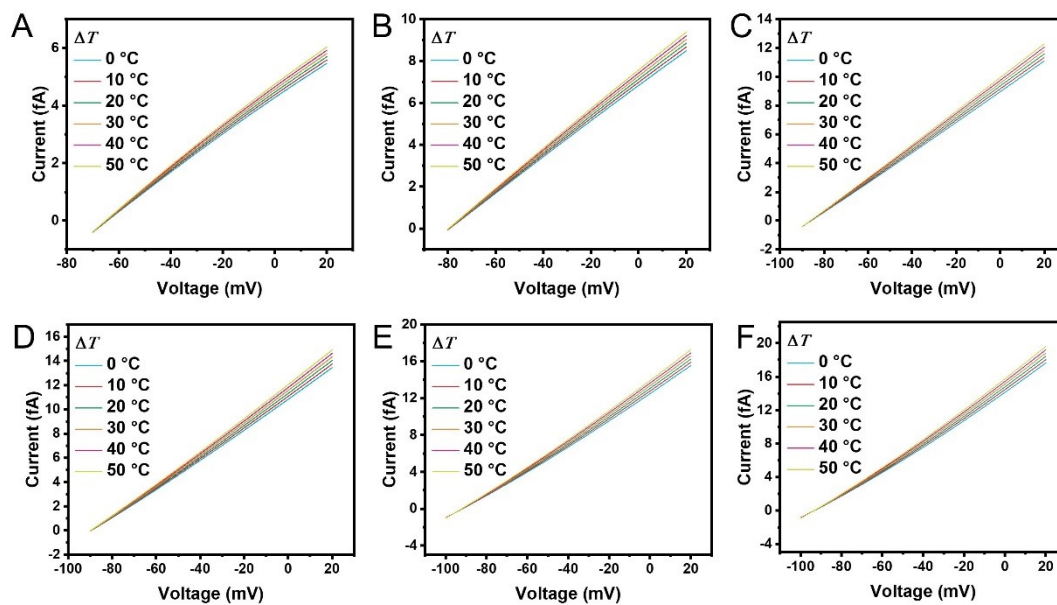

**Figure S12.** The simulated  $I$ - $V$  curves with the surface charge density of -1 to -6 mC/m<sup>2</sup> (A-E) under  $\Delta T$  from 0 to 50 °C.



## References

- [1] Z. Zhang, et al. *Proc. Natl. Acad. Sci.* 117 (2020) 13959-13966.
- [2] Y. Wu, et al. *Mater. Horiz.* 7 (2020) 2702-2709
- [3] W. Xin, et al. *ACS Nano* 14 (2020) 9701-9710.
- [4] L. Ding, et al. *Angew. Chem. Int. Ed.* 59 (2020) 8720-8726.
- [5] C. Zhu, et al. *J. Am. Chem. Soc.* 143 (2021) 1932-1940.
- [6] J. Chen, et al. *ACS Cent. Sci.* 7 (2021) 1486-1492.
- [7] L. Cao, et al. *J. Mater. Chem. A* 9 (2021) 14576-14581.
- [8] L. Zhang, et al. *Small* 17 (2021) e2100141.
- [9] G. Yang, et al. *ACS Nano* 15 (2021) 6594-6603.
- [10] X. Lin, et al. *Adv. Funct. Mater.* 31 (2021).
- [11] L. Ding, et al. *Angew. Chem. Int. Ed.* 61 (2022) e202206152.
- [12] Y. Qian, et al. *J. Am. Chem. Soc.* 144 (2022) 13764-13772.
- [13] W. Zhao, et al. *Nano Energy* 98 (2022) 107291.
- [14] F. Wang, et al. *J. Membr. Sci.* 647 (2022) 120280.
- [15] J. Hao, et al. *Electrochim. Acta* 423 (2022) 140581.
- [16] R. Qin, et al. *Nano Energy* 100 (2022) 107526.
- [17] T. Xiao, et al. *Nano Energy* 103 (2022) 107782.
- [18] J. Hao, et al. *J Colloid. Interface Sci.* 630 (2023) 795-803.
